# Supplementary material for: Resveratrol-Loaded Attalea funifera Oil Organogel Nanoparticles: A Potential Nanocarrier against A375 Human Melanoma Cells
Source: MDPI journal article supplement (doi:10.3390/ijms241512112), 2023-07-28

## Supplementary Material

**Figure S1.** *A. funifera* seed oil organogel nanoparticles (A) and resveratrol-*A. funifera* seed oil organogel (B).

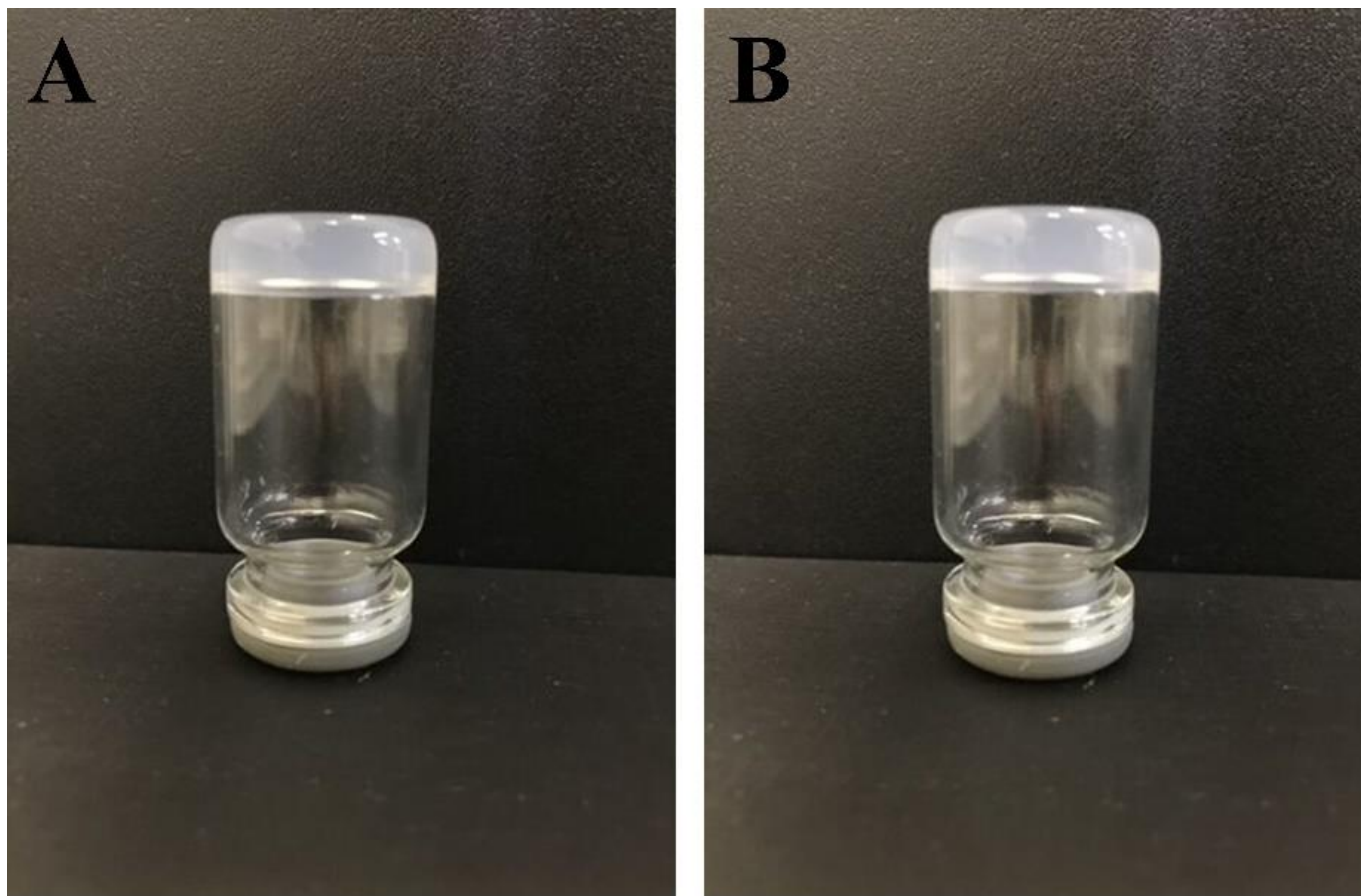

**Table S1.** Physicochemical characteristics of *Attalea funifera* seed oil.

| Parameter                 | Value*           |
|---------------------------|------------------|
| Acidity index (mgNaOH/g)  | 0.1770 ± 0.007   |
| Acidity in oleic acid (%) | 0.5580 ± 0.060   |
| Peroxide index (mEq/kg)   | 0.2600 ± 0.037   |
| Refractive index at 20 °C | 1.4515 ± < 0.001 |
| Density at 20 °C (g/cm)   | 0.9202 ± < 0.001 |

\*The values (means ± standard deviation) correspond to averages from three replicates (n = 3).

**Figure S2.** Scheme of protonation of the resveratrol observed at acid (pH 6) medium (MarvinSketch<sup>®</sup>, v. 18.11).

## Resveratrol

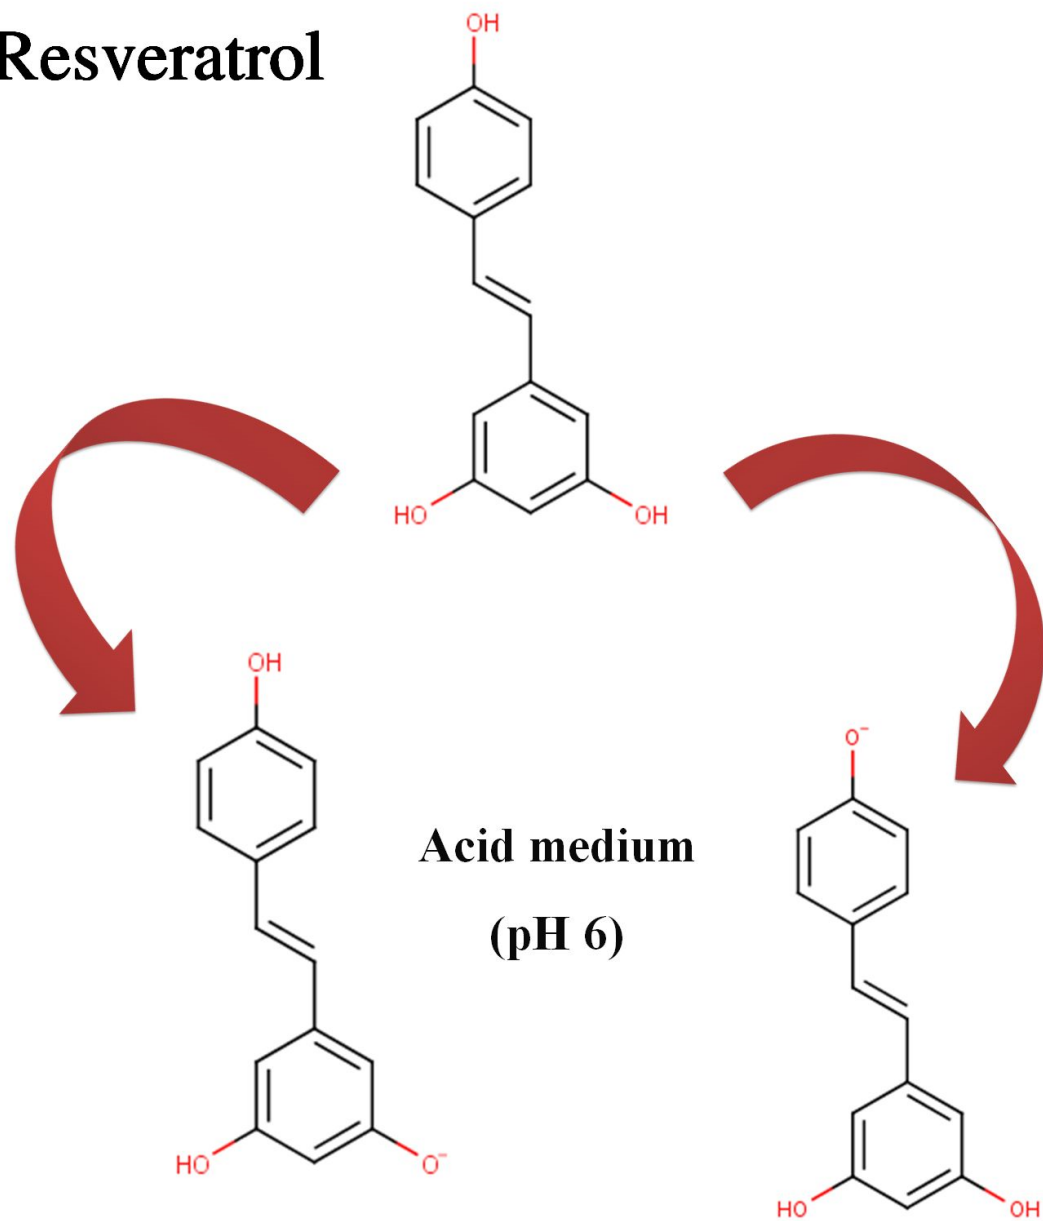

Supplement: s1 [file s1]
